# Supplementary material for: The German Small Lake and Pond Inventory
Source: Copernicus journal article supplement (doi:10.5194/essd-2024-563), 2025-01-27
Supplement: Supplementary file 1 [file essd-2024-563-supplement.pdf]

## Supplementary Material for the article

### *German inventory of small lakes and ponds*

Alexander Wachholz<sup>1</sup>, Susanne I. Schmidt<sup>2</sup>, Jens Arle<sup>1</sup>, Jeanette Völker<sup>1</sup>

<sup>1</sup> German Environment Agency (UBA), Department for Inland Waters, Wörlitzer Platz 1, 06844, Dessau-Roßlau, Germany

<sup>2</sup> Helmholtz Center for Environmental Research (UFZ), Department for Lake Research, Brückstraße 3a, 39114, Magdeburg, Germany

#### S1 Data sources

| Federal state     | URL to data                                                                                                                                                                                                                                                                                                                                                                     | Last accessed on | License                      |
|-------------------|---------------------------------------------------------------------------------------------------------------------------------------------------------------------------------------------------------------------------------------------------------------------------------------------------------------------------------------------------------------------------------|------------------|------------------------------|
| Bavaria           | <a href="https://geodaten.bayern.de/opengeodata/OpenDataDetail.html?pn=atkis_basis_dlm">https://geodaten.bayern.de/opengeodata/OpenDataDetail.html?pn=atkis_basis_dlm</a>                                                                                                                                                                                                       | 05.08.2024       |                              |
| Baden-Württemberg | <a href="https://www.lgl-bw.de/Produkte/Landschaftsmodelle/Basis-DLM/index.html">https://www.lgl-bw.de/Produkte/Landschaftsmodelle/Basis-DLM/index.html</a>                                                                                                                                                                                                                     | 02.08.2024       | Data License Germany By 2.0. |
| Berlin            | <a href="https://geobasis-bb.de/lgb/de/geodaten/landschaftsmodelle/basis-dlm/#">https://geobasis-bb.de/lgb/de/geodaten/landschaftsmodelle/basis-dlm/#</a>                                                                                                                                                                                                                       | 05.08.2024       | Data License Germany By 2.0. |
| Brandenburg       | <a href="https://geobasis-bb.de/lgb/de/geodaten/landschaftsmodelle/basis-dlm/#">https://geobasis-bb.de/lgb/de/geodaten/landschaftsmodelle/basis-dlm/#</a>                                                                                                                                                                                                                       | 05.08.2024       | Data License Germany By 2.0. |
| Bremen            | <a href="https://metaver.de/trefferanzeige?docuuid=265E2B65-66DB-4B17-AB29-FAFC8C9B6150&amp;q=bremen+basis+dlm&amp;f=">https://metaver.de/trefferanzeige?docuuid=265E2B65-66DB-4B17-AB29-FAFC8C9B6150&amp;q=bremen+basis+dlm&amp;f=</a>                                                                                                                                         | 02.08.2024       | Creative Commons By 4.0      |
| Hamburg           | <a href="https://metaver.de/trefferanzeige?docuuid=DDABB1F8-C90D-4849-95EE-18E9F8D6D0FA">https://metaver.de/trefferanzeige?docuuid=DDABB1F8-C90D-4849-95EE-18E9F8D6D0FA</a>                                                                                                                                                                                                     | 02.08.2024       | Creative Commons By 4.0      |
| Hessia            | <a href="https://gds.hessen.de/INTERSHOP/web/WFS/HLBG-Geodaten-Site/de_DE/-/EUR/ViewDownloadcenter-Start?path=Digitales%20Landschaftsmodell/Digitales%20Basis-Landschaftsmodell%20(shape)">https://gds.hessen.de/INTERSHOP/web/WFS/HLBG-Geodaten-Site/de_DE/-/EUR/ViewDownloadcenter-Start?path=Digitales%20Landschaftsmodell/Digitales%20Basis-Landschaftsmodell%20(shape)</a> | 02.08.2024       | Data License Germ            |

|                        |                                                                                                                                                                                                                     |            |                                |
|------------------------|---------------------------------------------------------------------------------------------------------------------------------------------------------------------------------------------------------------------|------------|--------------------------------|
|                        |                                                                                                                                                                                                                     |            | any Zero 2.0.                  |
| Mecklenburg-Vorpommern | <a href="https://www.laiv-mv.de/Geoinformation/Geobasisdaten/Landschaftsmodelle/">https://www.laiv-mv.de/Geoinformation/Geobasisdaten/Landschaftsmodelle/</a>                                                       | 02.08.2024 | Creative Commons By 4.0        |
| Niedersachsen          | <a href="https://ni-lgin-opengeodata.hub.arcgis.com/documents/lgin-opengeodata::basis-dlm-shapefile/about">https://ni-lgin-opengeodata.hub.arcgis.com/documents/lgin-opengeodata::basis-dlm-shapefile/about</a>     | 02.08.2024 | Creative Commons By 4.0        |
| North Rhine Westphalia | <a href="https://www.opengeodata.nrw.de/produkte/geobasis/lm/akt/basis-dlm/">https://www.opengeodata.nrw.de/produkte/geobasis/lm/akt/basis-dlm/</a>                                                                 | 02.08.2024 | Data License Germany Zero 2.0. |
| Rhineland Palatine     | <a href="https://www.geoportal.rlp.de/mapbender/php/wfs.php?FEATURETYPE_ID=3622&amp;INSPIRE=1&amp;INSPIRE=1">https://www.geoportal.rlp.de/mapbender/php/wfs.php?FEATURETYPE_ID=3622&amp;INSPIRE=1&amp;INSPIRE=1</a> | 28.10.2024 | Data License Germany By 2.0.   |
| Saxony                 | <a href="https://www.geodaten.sachsen.de/landschaftsmodelle-3991.html">https://www.geodaten.sachsen.de/landschaftsmodelle-3991.html</a>                                                                             | 02.08.2024 | Data License Germany By 2.0.   |
| Saxony-Anhalt          | <a href="https://geodatenportal.sachsen-anhalt.de/gfds/de/gdp-basis-dlm-lsa.html">https://geodatenportal.sachsen-anhalt.de/gfds/de/gdp-basis-dlm-lsa.html</a>                                                       | 02.08.2024 | Data License Germany By 2.0.   |
| Saarland               | <a href="https://geoportal.saarland.de/gdi-sl/inspirewfs_Hydro_Physische_Gewaesser_ATKIS_BDLM">https://geoportal.saarland.de/gdi-sl/inspirewfs_Hydro_Physische_Gewaesser_ATKIS_BDLM</a>                             | 28.10.2024 | Data License Germany By 2.0.   |

|                    |                                                                                                                                                                                                                         |            |                             |
|--------------------|-------------------------------------------------------------------------------------------------------------------------------------------------------------------------------------------------------------------------|------------|-----------------------------|
| Schleswig-Holstein | <a href="https://geodaten.schleswig-holstein.de/gaialight-sh/_apps/dl/download/dl-atkis_bdlm.html">https://geodaten.schleswig-holstein.de/gaialight-sh/_apps/dl/download/dl-atkis_bdlm.html</a>                         | 02.08.2024 | Creative Commons By 4.0     |
| Thuringia          | <a href="https://geoportal.thueringen.de/gdi-th/download-offene-geodaten/download-digitales-landschaftsmodell">https://geoportal.thueringen.de/gdi-th/download-offene-geodaten/download-digitales-landschaftsmodell</a> | 02.08.2024 | Data License Germany By 2.0 |

## S2 Figures

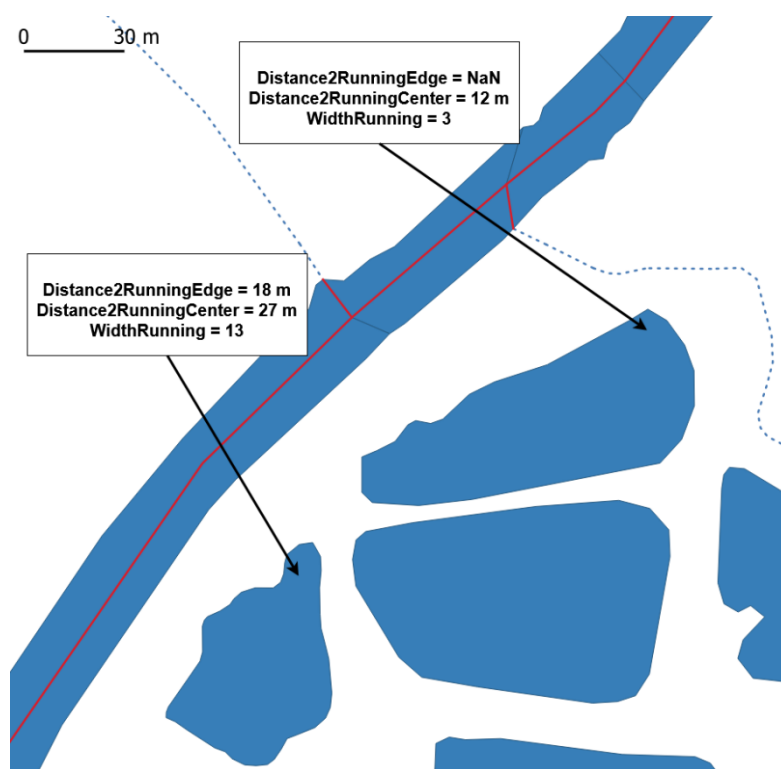

Figure S1: Example of the metrics describing lakes or ponds distance to the river network. The blue dashed line represents a stream or river with a width less than 12 meters. The blue polygon represents a river with wider than 12 meters. The red line represents the middle line of the polygon, as well as the hypothetical connection to the smaller river/stream.

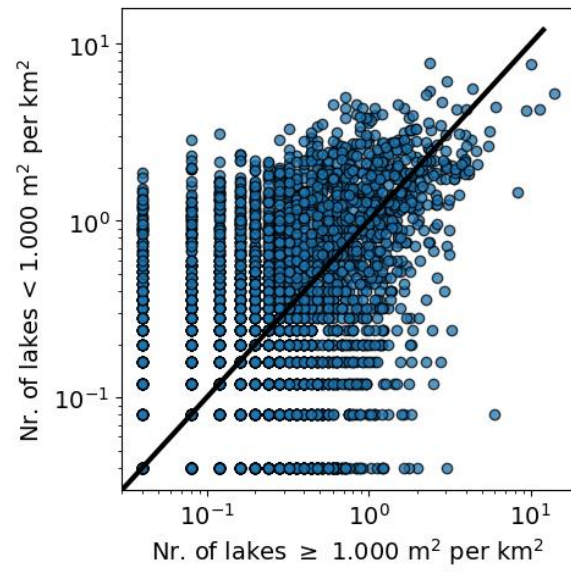

Figure S2: Relationship between density of lakes  $\geq 1.000$  and lakes  $< 1.000 \text{ m}^2$ . The number of lakes refers to the lakes within each  $5 \times 5 \text{ km}$  grid cell, as shown in Fig.1.

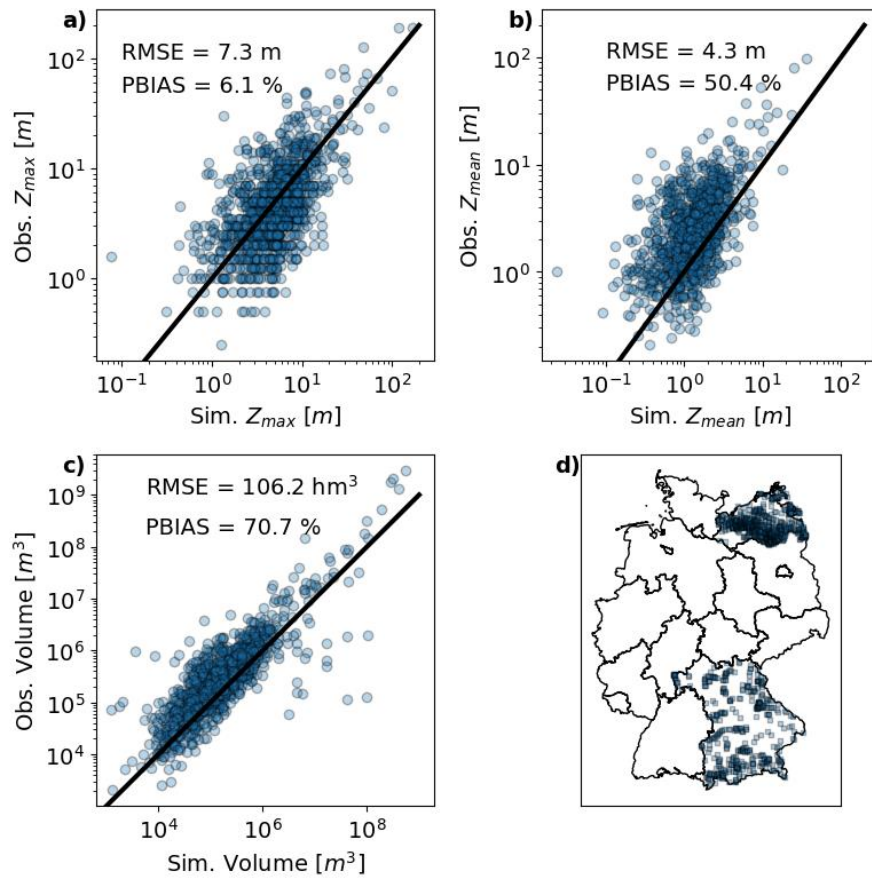

Figure S3: Simulated versus observed lake or pond maximum depth (a), mean depth (max. depth by area) (b) and volume (c) for ~1.600 lakes and ponds located in Bavaria and Mecklenburg Vorpommern (d).

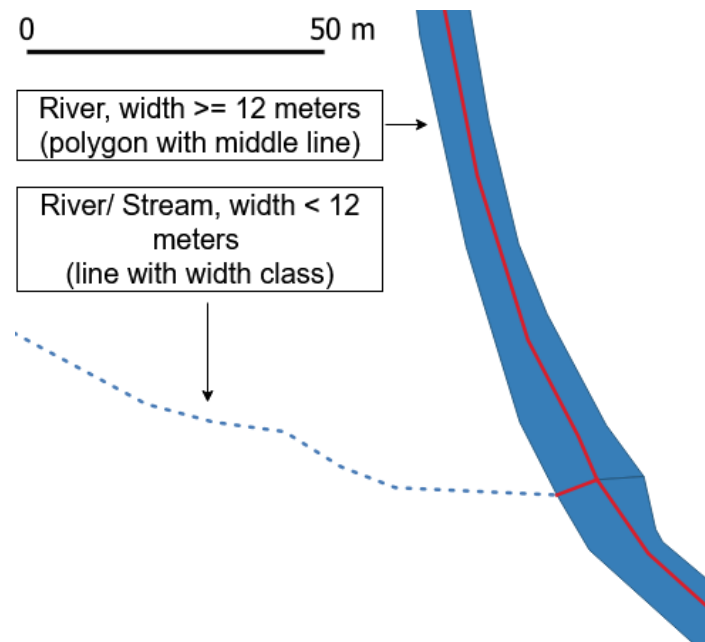

Figure S4: Representation of rivers and streams in the ATKIS Basis DLM. The blue dashed line represents a stream or river with a width less than 12 meters. The blue polygon represents a river with wider than 12 meters. The red line represents the middle line of the polygon, as well as the hypothetical connection to the smaller river/ stream.

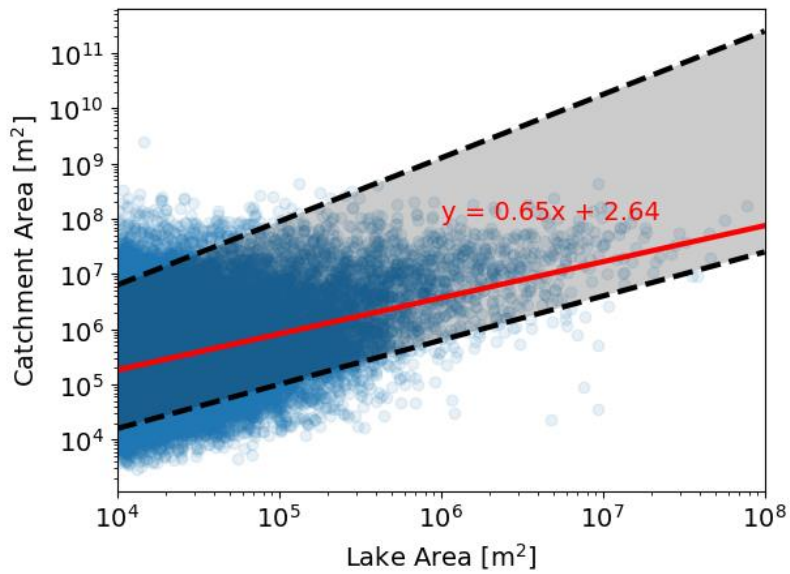

Figure S5: Relationship between lake/pond and catchment area for all lakes & ponds > 10.000 m<sup>2</sup> (1 ha). The red line shows a fitted linear regression line between log<sub>10</sub> of lake area and catchment area. The shaded area represents the span of linear relationships between lake and catchment area described by (Walter et al., 2020).

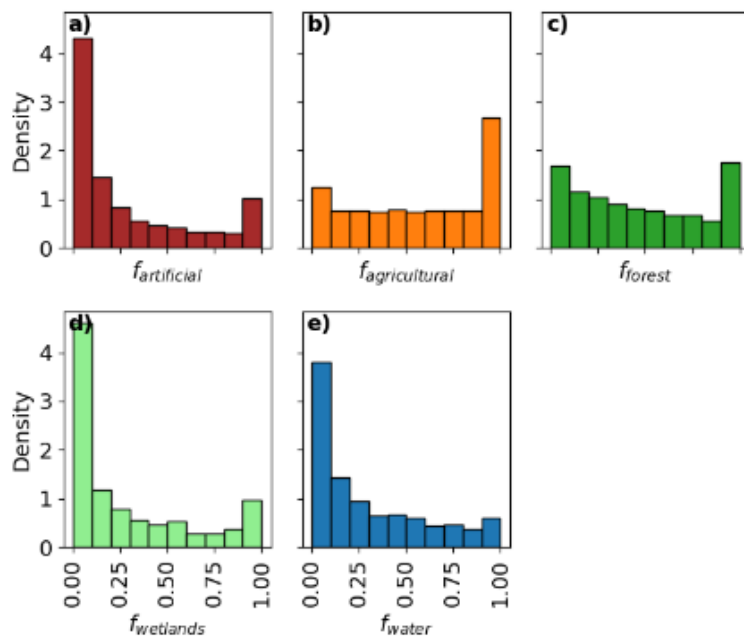

Figure S6: Fraction of the small lake or pond catchments covered by the CORINE level one land cover classes.
